# Supplementary material
Source: Research Square preprint supplement (doi:10.21203/rs.3.rs-9306862/v1)
Supplement: Supplementary file 1 [file fcf6b8418e3329eee891dc60.docx]

**Supplementary Table 8. Baseline characteristics and outcome frequencies — Zambia HIV EHR cohort**

All values are from raw, pre-imputation data. Facility-level columns sum to the overall column for each row. n (%) are of the stated denominator for each section; see section headers and footnotes. IQR = interquartile range. — = not applicable.

| Variable | Overall N = 246,053 | Chawama N = 47,314 | Chelstone N = 31,785 | George N = 35,577 | Kanyama N = 56,871 | Matero Main N = 26,845 | Matero Ref N = 47,661 |
| --- | --- | --- | --- | --- | --- | --- | --- |
| 1. Demographics | | | | | | | |
| Age at enrolment, years — median (IQR) | 32.0 (26–38) | 31.0 (25–38) | 32.0 (26–39) | 31.0 (25–38) | 31.0 (25–38) | 32.0 (26–39) | 32.0 (26–39) |
| Missing — n (%) | 356 (0.1%) | 347 (0.7%) | 1 (0.0%) | 2 (0.0%) | 2 (0.0%) | 0 (0.0%) | 4 (0.0%) |
| Sex | — | — | — | — | — | — | — |
| Female — n (%) | 153,637 (62.5%) | 29,579 (63.0%) | 20,244 (63.7%) | 21,942 (61.7%) | 34,726 (61.1%) | 17,712 (66.0%) | 29,434 (61.8%) |
| Male — n (%) | 92,063 (37.5%) | 17,386 (37.0%) | 11,540 (36.3%) | 13,634 (38.3%) | 22,143 (38.9%) | 9,133 (34.0%) | 18,227 (38.2%) |
| Missing — n (%) | 353 (0.1%) | 349 (0.7%) | 1 (0.0%) | 1 (0.0%) | 2 (0.0%) | 0 (0.0%) | 0 (0.0%) |
| Marital status | — | — | — | — | — | — | — |
| *Percentages are of patients with any marital status recorded (n = 185,405; 75.4% of cohort)* | | | | | | | |
| Married — n (%) | 112,095 (60.5%) | 21,674 (59.0%) | 13,114 (56.0%) | 15,554 (62.2%) | 28,342 (62.7%) | 12,344 (57.3%) | 21,067 (62.9%) |
| Single — n (%) | 28,624 (15.4%) | 5,841 (15.9%) | 4,824 (20.6%) | 3,025 (12.1%) | 6,173 (13.6%) | 3,664 (17.0%) | 5,097 (15.2%) |
| Divorced/separated — n (%) | 26,900 (14.5%) | 5,606 (15.3%) | 3,089 (13.2%) | 3,965 (15.9%) | 6,698 (14.8%) | 3,387 (15.7%) | 4,155 (12.4%) |
| Widowed — n (%) | 17,786 (9.6%) | 3,615 (9.8%) | 2,375 (10.1%) | 2,451 (9.8%) | 4,013 (8.9%) | 2,166 (10.0%) | 3,166 (9.5%) |
| Missing — n (%) | 60,648 (24.6%) | 10,578 (22.4%) | 8,383 (26.4%) | 10,582 (29.7%) | 11,645 (20.5%) | 5,284 (19.7%) | 14,176 (29.7%) |
| Education level | — | — | — | — | — | — | — |
| *Only 12,766 patients (5.2%) had any education value recorded. Percentages below are of those 12,766 patients. Missing = 233,287 (94.8%).* | | | | | | | |
| Patients with any education recorded — n (% of cohort) | 12,766 (5.2%) | 2,308 (4.9%) | 1,608 (5.1%) | 1,133 (3.2%) | 4,486 (7.9%) | 309 (1.2%) | 2,922 (6.1%) |
| None/primary — n (% of recorded)a | 3,172 (24.8%) | 624 (27.0%) | 368 (22.9%) | 415 (36.6%) | 1,196 (26.7%) | 41 (13.3%) | 528 (18.1%) |
| Junior secondary — n (% of recorded) | 4,291 (33.6%) | 816 (35.4%) | 365 (22.7%) | 304 (26.8%) | 1,641 (36.6%) | 98 (31.7%) | 1,067 (36.5%) |
| Senior secondary — n (% of recorded) | 4,406 (34.5%) | 727 (31.5%) | 559 (34.8%) | 387 (34.2%) | 1,456 (32.5%) | 141 (45.6%) | 1,136 (38.9%) |
| Tertiary (certificate/diploma/degree/postgraduate) — n (% of recorded)b | 897 (7.0%) | 141 (6.1%) | 316 (19.7%) | 27 (2.4%) | 193 (4.3%) | 29 (9.4%) | 191 (6.5%) |
| Missing — n (% of cohort) | 233,287 (94.8%) | 45,006 (95.1%) | 30,177 (94.9%) | 34,444 (96.8%) | 52,385 (92.1%) | 26,536 (98.8%) | 44,739 (93.9%) |
| Household income (hhinc) | — | — | — | — | — | — | — |
| *Only 29,774 patients (12.1%) had any income value recorded. Percentages are of those 29,774 patients. Missing = 216,279 (87.9%).* | | | | | | | |
| Patients with any income recorded — n (% of cohort) | 29,774 (12.1%) | 9,353 (19.8%) | 3,144 (9.9%) | 1,658 (4.7%) | 10,017 (17.6%) | 2,487 (9.3%) | 3,115 (6.5%) |
| < ZMW 500/month — n (%) | 3,717 (12.5%) | 939 (10.0%) | 446 (14.2%) | 266 (16.0%) | 1,438 (14.4%) | 214 (8.6%) | 414 (13.3%) |
| ZMW 500–999/month — n (%) | 8,577 (28.8%) | 2,620 (28.0%) | 990 (31.5%) | 591 (35.6%) | 3,170 (31.6%) | 470 (18.9%) | 736 (23.6%) |
| ZMW 1,000–1,499/month — n (%) | 8,321 (27.9%) | 2,657 (28.4%) | 587 (18.7%) | 433 (26.1%) | 3,221 (32.2%) | 645 (25.9%) | 778 (25.0%) |
| ZMW 1,500–1,999/month — n (%) | 4,149 (13.9%) | 1,427 (15.3%) | 359 (11.4%) | 171 (10.3%) | 1,116 (11.1%) | 544 (21.9%) | 532 (17.1%) |
| ZMW 2,000–2,999/month — n (%) | 2,935 (9.9%) | 1,032 (11.0%) | 358 (11.4%) | 118 (7.1%) | 729 (7.3%) | 328 (13.2%) | 370 (11.9%) |
| ≥ ZMW 3,000/month — n (%) | 2,075 (7.0%) | 678 (7.2%) | 404 (12.8%) | 79 (4.8%) | 343 (3.4%) | 286 (11.5%) | 285 (9.1%) |
| Missing — n (% of cohort) | 216,279 (87.9%) | 37,961 (80.2%) | 28,641 (90.1%) | 33,919 (95.3%) | 46,854 (82.4%) | 24,358 (90.7%) | 44,546 (93.5%) |
| 2. Anthropometrics at enrolment | | | | | | | |
| Weight (kg) — median (IQR) | 58.0 (50–67) | 57.0 (50–65) | 60.0 (52–69) | 56.0 (50–65) | 57.0 (50–65) | 60.0 (52–70) | 59.0 (52–68) |
| Missing — n (%) | 24,883 (10.1%) | 5,279 (11.2%) | 2,238 (7.0%) | 4,131 (11.6%) | 4,215 (7.4%) | 4,405 (16.4%) | 4,615 (9.7%) |
| Height (cm) — median (IQR) | 162.0 (156–168) | 162.0 (156–168) | 163.0 (157–169) | 161.0 (155–168) | 162.0 (155–170) | 163.0 (157–169) | 161.0 (155–168) |
| Missing — n (%) | 35,192 (14.3%) | 6,890 (14.6%) | 3,444 (10.8%) | 4,978 (14.0%) | 5,606 (9.9%) | 7,649 (28.5%) | 6,625 (13.9%) |
| BMI (kg/m²) — median (IQR) | 21.8 (19.1–25.2) | 21.5 (19.0–24.7) | 22.2 (19.5–25.8) | 21.4 (18.9–24.5) | 21.3 (18.7–24.5) | 22.4 (19.6–26.3) | 22.3 (19.6–26.2) |
| Missing — n (%) | 39,135 (15.9%) | 7,604 (16.1%) | 3,848 (12.1%) | 5,678 (16.0%) | 6,621 (11.6%) | 7,966 (29.7%) | 7,418 (15.6%) |
| *BMI categories — among 206,918 patients with valid BMI (84.1% of cohort). Percentages are of valid-BMI patients.* | | | | | | | |
| BMI < 18.5 (underweight) — n (%) | 40,150 (19.4%) | 8,386 (21.1%) | 4,571 (16.4%) | 6,220 (20.8%) | 11,341 (22.6%) | 3,114 (16.5%) | 6,518 (16.2%) |
| BMI 18.5–24.9 (normal) — n (%) | 113,305 (54.8%) | 22,042 (55.5%) | 15,206 (54.4%) | 17,021 (56.9%) | 27,842 (55.4%) | 9,844 (52.1%) | 21,350 (53.1%) |
| BMI 25.0–29.9 (overweight) — n (%) | 34,640 (16.7%) | 6,231 (15.7%) | 5,220 (18.7%) | 4,554 (15.2%) | 7,383 (14.7%) | 3,626 (19.2%) | 7,626 (18.9%) |
| BMI ≥ 30.0 (obese) — n (%) | 18,823 (9.1%) | 3,051 (7.7%) | 2,940 (10.5%) | 2,104 (7.0%) | 3,684 (7.3%) | 2,295 (12.2%) | 4,749 (11.8%) |
| 3. Clinical characteristics at enrolment | | | | | | | |
| WHO HIV stage at enrolment | — | — | — | — | — | — | — |
| *Recorded for 56,141 patients (22.8% of cohort). Percentages are of those 56,141 patients.* | | | | | | | |
| Stage 1 — n (%) | 42,741 (76.1%) | 8,708 (76.4%) | 6,299 (88.5%) | 6,693 (76.3%) | 8,944 (68.5%) | 4,579 (79.8%) | 7,518 (74.8%) |
| Stage 2 — n (%) | 7,767 (13.8%) | 1,451 (12.7%) | 481 (6.8%) | 1,456 (16.6%) | 2,315 (17.7%) | 770 (13.4%) | 1,294 (12.9%) |
| Stage 3 — n (%) | 5,264 (9.4%) | 1,135 (10.0%) | 320 (4.5%) | 582 (6.6%) | 1,680 (12.9%) | 376 (6.6%) | 1,171 (11.7%) |
| Stage 4 — n (%) | 369 (0.7%) | 110 (1.0%) | 21 (0.3%) | 38 (0.4%) | 118 (0.9%) | 14 (0.2%) | 68 (0.7%) |
| Missing — n (% of cohort) | 189,912 (77.2%) | 35,910 (75.9%) | 24,664 (77.6%) | 26,808 (75.4%) | 43,814 (77.0%) | 21,106 (78.6%) | 37,610 (78.9%) |
| Enrolment functional status | — | — | — | — | — | — | — |
| *Recorded for 38,015 patients (15.4%). Percentages are of those 38,015 patients.* | | | | | | | |
| Healthy/able to work — n (%) | 31,708 (83.4%) | 7,298 (86.5%) | 5,041 (94.5%) | 4,307 (90.7%) | 6,939 (75.4%) | 2,765 (89.7%) | 5,358 (74.3%) |
| Sick/able to work — n (%) | 4,861 (12.8%) | 952 (11.3%) | 235 (4.4%) | 355 (7.5%) | 1,665 (18.1%) | 287 (9.3%) | 1,367 (18.9%) |
| Sick/unable to work — n (%) | 1,364 (3.6%) | 174 (2.1%) | 53 (1.0%) | 87 (1.8%) | 571 (6.2%) | 30 (1.0%) | 449 (6.2%) |
| Bedridden — n (%) | 82 (0.2%) | 10 (0.1%) | 4 (0.1%) | 1 (0.0%) | 25 (0.3%) | 0 (0.0%) | 42 (0.6%) |
| Missing — n (% of cohort) | 208,038 (84.6%) | 38,880 (82.2%) | 26,452 (83.2%) | 30,827 (86.6%) | 47,671 (83.8%) | 23,763 (88.5%) | 40,445 (84.9%) |
| On TB treatment at enrolment — Yes, n (%) | 1,323 (0.5%) | 125 (0.3%) | 145 (0.5%) | 201 (0.6%) | 302 (0.5%) | 117 (0.4%) | 433 (0.9%) |
| Missing — n (%) | 0 (0.0%) | 0 (0.0%) | 0 (0.0%) | 0 (0.0%) | 0 (0.0%) | 0 (0.0%) | 0 (0.0%) |
| Past TB type | — | — | — | — | — | — | — |
| *Recorded for only 2,104 patients (0.9% of cohort). Near-total absence limits usability for modelling. Percentages are of 2,104.* | | | | | | | |
| Pulmonary — n (%) | 1,418 (67.4%) | 173 (42.3%) | 148 (83.1%) | 90 (33.0%) | 395 (76.7%) | 67 (54.5%) | 545 (89.9%) |
| Extrapulmonary — n (%) | 400 (19.0%) | 146 (35.7%) | 18 (10.1%) | 159 (58.2%) | 37 (7.2%) | 20 (16.3%) | 20 (3.3%) |
| Both — n (%) | 286 (13.6%) | 90 (22.0%) | 12 (6.7%) | 24 (8.8%) | 83 (16.1%) | 36 (29.3%) | 41 (6.8%) |
| Missing — n (% of cohort) | 243,949 (99.1%) | 46,905 (99.1%) | 31,607 (99.4%) | 35,304 (99.2%) | 56,356 (99.1%) | 26,722 (99.5%) | 47,055 (98.7%) |
| Year of ART enrolment | — | — | — | — | — | — | — |
| Before 2010 — n (%) | 62,738 (25.5%) | 8,679 (18.3%) | 10,278 (32.3%) | 9,302 (26.1%) | 16,651 (29.3%) | 5,128 (19.1%) | 12,700 (26.6%) |
| 2010–2015 — n (%) | 67,126 (27.3%) | 12,094 (25.6%) | 9,154 (28.8%) | 10,115 (28.4%) | 15,951 (28.0%) | 7,633 (28.4%) | 12,179 (25.6%) |
| 2016–2019 — n (%) | 66,248 (26.9%) | 14,783 (31.2%) | 7,486 (23.6%) | 10,162 (28.6%) | 14,264 (25.1%) | 6,628 (24.7%) | 12,925 (27.1%) |
| 2020–present — n (%) | 49,939 (20.3%) | 11,758 (24.9%) | 4,867 (15.3%) | 5,997 (16.9%) | 10,005 (17.6%) | 7,456 (27.8%) | 9,856 (20.7%) |
| 4. Pre-index laboratory results (file4) | | | | | | | |
| *Data available for 8,233 patients (3.3% of cohort). Section 4 denominators are this sub-cohort unless stated. Per-facility coverage: Chawama 3.6%; Chelstone 3.5%; George 2.0%; Kanyama 3.8%; Matero Main 3.3%; Matero Ref 3.6%.* | | | | | | | |
| Patients with any pre-index lab data — n (% of cohort) | 8,233 (3.3%) | 1,680 (3.6%) | 1,109 (3.5%) | 710 (2.0%) | 2,139 (3.8%) | 878 (3.3%) | 1,717 (3.6%) |
| Last pre-index viral load (copies/mL) — median (IQR)c | 925 (20–129,354) | 48 (10–24,400) | 14,350 (21–212,161) | 85 (19–19,158) | 33,300 (54–312,250) | 20 (1–30) | 30 (3–42,640) |
| Ever unsuppressed pre-index (VL ≥ 1,000) — n (% of lab sub-cohort) | 1,059 (12.9%) | 88 (5.2%) | 232 (20.9%) | 70 (9.9%) | 466 (21.8%) | 13 (1.5%) | 190 (11.1%) |
| Number of VL tests pre-index — median (IQR) | 0 (0–1) | 0 (0–0) | 0 (0–1) | 0 (0–1) | 0 (0–1) | 0 (0–0) | 0 (0–1) |
| Last pre-index CD4 count (cells/µL) — median (IQR)c | 201 (169–441) | 260 (169–482) | 233 (137–431) | 301 (201–537) | 201 (171–340) | 721 (503–770) | 201 (150–474) |
| CD4 < 200 cells/µL — n (%) | 209 (2.5%) | 41 (2.4%) | 29 (2.6%) | 9 (1.3%) | 97 (4.5%) | 1 (0.1%) | 32 (1.9%) |
| CD4 < 100 cells/µL — n (%) | 82 (1.0%) | 20 (1.2%) | 16 (1.4%) | 3 (0.4%) | 32 (1.5%) | 0 (0.0%) | 11 (0.6%) |
| Any TB diagnostic test pre-index — n (%) | 845 (10.3%) | 212 (12.6%) | 79 (7.1%) | 58 (8.2%) | 288 (13.5%) | 66 (7.5%) | 142 (8.3%) |
| Any positive TB test pre-index — n (%) | 347 (4.2%) | 87 (5.2%) | 37 (3.3%) | 36 (5.1%) | 137 (6.4%) | 15 (1.7%) | 35 (2.0%) |
| Any drug resistance detected pre-index — n (%) | 1 (0.0%) | 0 (0.0%) | 1 (0.1%) | 0 (0.0%) | 0 (0.0%) | 0 (0.0%) | 0 (0.0%) |
| 5. Pre-index engagement features (file2) | | | | | | | |
| *Data available for 30,295 patients (12.3% of cohort). Section 5 denominators are this sub-cohort unless stated.* | | | | | | | |
| Patients with any pre-index visit data — n (% of cohort) | 30,295 (12.3%) | 6,769 (14.3%) | 4,420 (13.9%) | 3,033 (8.5%) | 5,424 (9.5%) | 3,755 (14.0%) | 6,894 (14.5%) |
| Number of pre-index visits — median (IQR) | 2 (1–2) | 2 (2–2) | 2 (1–3) | 2 (1–2) | 2 (1–3) | 2 (1–2) | 2 (1–2) |
| Days since last visit before index — median (IQR) | 28 (13–130) | 36 (14–365) | 28 (13–86) | 22 (13–90) | 27 (11–91) | 40 (14–272) | 17 (6–79) |
| Last recorded WHO stage pre-index | — | — | — | — | — | — | — |
| *Percentages are of patients with a WHO stage recorded in file2 (n = 11,389; 37.6% of visit sub-cohort). Missing stage: 18,906 (62.4%).* | | | | | | | |
| Stage 1 — n (%) | 7,548 (66.3%) | 1,392 (64.2%) | 1,303 (79.7%) | 1,020 (69.2%) | 1,432 (57.5%) | 867 (71.1%) | 1,534 (63.8%) |
| Stage 2 — n (%) | 1,738 (15.3%) | 245 (11.3%) | 167 (10.2%) | 276 (18.7%) | 514 (20.7%) | 180 (14.8%) | 356 (14.8%) |
| Stage 3 — n (%) | 1,985 (17.4%) | 487 (22.5%) | 157 (9.6%) | 165 (11.2%) | 517 (20.8%) | 167 (13.7%) | 492 (20.5%) |
| Stage 4 — n (%) | 118 (1.0%) | 43 (2.0%) | 7 (0.4%) | 14 (0.9%) | 26 (1.0%) | 5 (0.4%) | 23 (1.0%) |
| Mean appointment lateness (days) — winsorised ±730d | 730 (−14 – 730) | 730 (−14 – 730) | 730 (−30 – 730) | 730 (−14 – 730) | 730 (0 – 730) | 14 (−14 – 730) | 730 (−28 – 730) |
| *Raw (unwinsorised) median was 10,633 days — driven by data entry errors. 16,439 patients (54.3%) had |max_days_late| > 730 days; maximum recorded = 45,459 days (≈124 years).* | | | | | | | |
| Patients with implausible lateness (|max_days_late| > 730 days) — n (%) | 16,439 (54.3%) | 3,580 (52.9%) | 2,317 (52.4%) | 1,971 (65.0%) | 2,957 (54.5%) | 1,980 (52.7%) | 3,634 (52.7%) |
| 6. Study outcomes — 12-month window after ART enrolment date | | | | | | | |
| *All patients (n = 246,053) have an outcome label (no indeterminate cases in current operationalisation). Definition notes: see footnotes e, f, g.* | | | | | | | |
| Incident TB (TB12m)e | — | — | — | — | — | — | — |
| Positive — n (%) | 88,585 (36.0%) | 15,307 (32.4%) | 11,565 (36.4%) | 11,437 (32.1%) | 19,503 (34.3%) | 12,981 (48.4%) | 17,792 (37.3%) |
| Negative — n (%) | 157,468 (64.0%) | 32,007 (67.6%) | 20,220 (63.6%) | 24,140 (67.9%) | 37,368 (65.7%) | 13,864 (51.6%) | 29,869 (62.7%) |
| Indeterminate — n (%) | 0 (0.0%) | 0 (0.0%) | 0 (0.0%) | 0 (0.0%) | 0 (0.0%) | 0 (0.0%) | 0 (0.0%) |
| Interruption in treatment (IIT12m)f | — | — | — | — | — | — | — |
| Positive — n (%) | 1,378 (0.6%) | 270 (0.6%) | 65 (0.2%) | 232 (0.7%) | 338 (0.6%) | 164 (0.6%) | 309 (0.6%) |
| Negative — n (%) | 244,675 (99.4%) | 47,044 (99.4%) | 31,720 (99.8%) | 35,345 (99.3%) | 56,533 (99.4%) | 26,681 (99.4%) | 47,352 (99.4%) |
| Indeterminate — n (%) | 0 (0.0%) | 0 (0.0%) | 0 (0.0%) | 0 (0.0%) | 0 (0.0%) | 0 (0.0%) | 0 (0.0%) |
| Unsuppressed viral load (UVL12m)g | — | — | — | — | — | — | — |
| Positive (VL ≥ 1,000, tested) — n (%) | 3,564 (1.4%) | 576 (1.2%) | 585 (1.8%) | 286 (0.8%) | 1,246 (2.2%) | 215 (0.8%) | 656 (1.4%) |
| Negative (VL < 1,000 OR untested) — n (%) | 242,489 (98.6%) | 46,738 (98.8%) | 31,200 (98.2%) | 35,291 (99.2%) | 55,625 (97.8%) | 26,630 (99.2%) | 47,005 (98.6%) |
| Indeterminate — n (%) | 0 (0.0%) | 0 (0.0%) | 0 (0.0%) | 0 (0.0%) | 0 (0.0%) | 0 (0.0%) | 0 (0.0%) |
| 7. AI model train / test facility split | | | | | | | |
| Training facilities (4) | Chawama, Chelstone, George, Kanyama | ✓ | ✓ | ✓ | ✓ | — | — |
| Test / holdout facilities (2) | Matero Main, Matero Reference | — | — | — | — | ✓ | ✓ |
| N patients in training set | 171,547 (69.7%) | 47,314 | 31,785 | 35,577 | 56,871 | — | — |
| N patients in test set | 74,506 (30.3%) | — | — | — | — | 26,845 | 47,661 |
| TB12m prevalence: train vs test | 33.7% vs 41.3% (+7.6 pp) | 32.4% | 36.4% | 32.1% | 34.3% | 48.4% | 37.3% |
| IIT12m prevalence: train vs test | 0.53% vs 0.63% (+0.1 pp) | 0.57% | 0.20% | 0.65% | 0.59% | 0.61% | 0.65% |
| UVL12m prevalence: train vs test | 1.57% vs 1.17% (−0.4 pp) | 1.22% | 1.84% | 0.80% | 2.19% | 0.80% | 1.38% |
| Split pre-specified? | YES — Matero facilities designated as holdout a priori | — | — | — | — | — | — |

**Footnotes**

1. None/primary includes: 'No Formal Education' (n = 190 overall) and 'Primary' (n = 2,982 overall).
2. Tertiary includes: Certificate Graduate (n = 278), Diploma Graduate (n = 437), Degree Graduate (n = 156), Masters Graduate (n = 23), PhD Graduate (n = 3).
3. Median VL and CD4 are computed only among patients who had at least one pre-index result of the respective type. Many patients within the 3.3% lab sub-cohort had zero VL or CD4 tests pre-index.
4. Appointment lateness values are winsorised at ±730 days for reporting, as 54.3% of patients with engagement data had |max_days_late| > 730 days (maximum observed: 45,459 days ≈ 124 years), almost certainly reflecting date-entry errors (e.g., entering '2014' instead of '2024' adds approximately 3,650 days of apparent lateness).
5. TB12m definition: tb_rx = 'Yes' in file2 at any visit 0–365 days after the index date (ART start date). This definition cannot distinguish incident (new) TB from ongoing TB treatment that began before enrolment. The notably high overall prevalence (36.0%) and the absence of any indeterminate cases reflect that all patients with any visit data in the 12-month window contribute to the label.
6. IIT12m definition: inactive = TRUE in file3 with inactive_date 0–365 days after the index date. The observed prevalence of 0.56% is substantially lower than the expected 15–30% from WHO/PEPFAR programme benchmarks. An appointment-gap-based alternative definition (e.g., no visit within 90 days of scheduled appointment) would likely yield higher and more epidemiologically plausible prevalence estimates and is recommended for future work.
7. UVL12m definition: VL ≥ 1,000 copies/mL in file4 at any test 0–365 days after the index date. Patients with no post-index VL test are coded 0 (assumed virologically suppressed). This assumption may underestimate true unsuppressed VL prevalence at facilities with lower testing rates, as patients who disengage from care are both less likely to be tested and more likely to be unsuppressed.

*Abbreviations: ART = antiretroviral therapy; BMI = body mass index; EHR = electronic health record; IIT = interruption in treatment; IQR = interquartile range; TB = tuberculosis; UVL = unsuppressed viral load; VL = viral load; WHO = World Health Organization; ZMW = Zambian kwacha.*
